# Supplementary material for: Evaluation of the Pharmacokinetics and Hepatoprotective Effects of Phillygenin in Mouse
Source: Hindawi journal article supplement (doi:10.1155/2018/7964318), 2018-08-23
Supplement: f1 [file 7964318.f1.pdf]

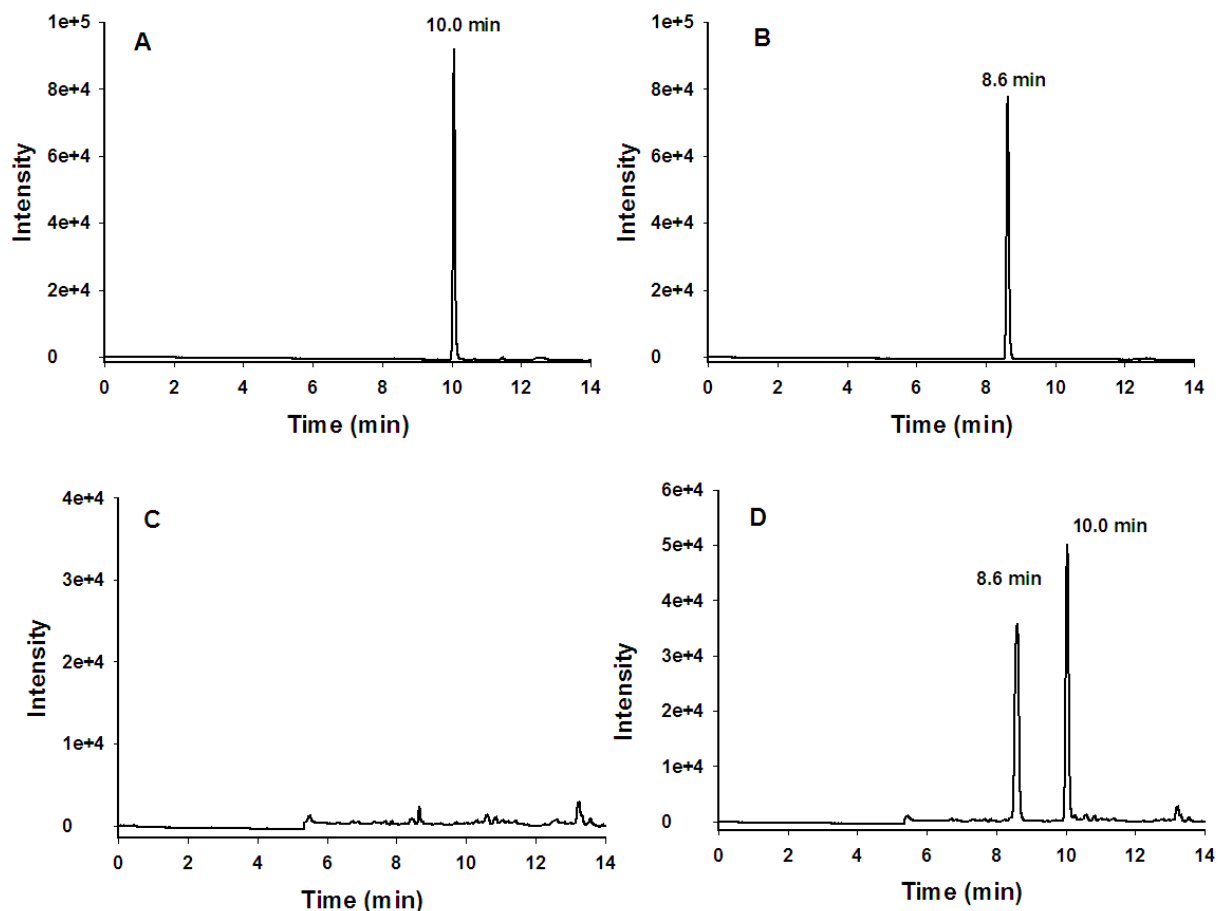

**Figure. S1.** UPLC-MS/MS of (A) standard phillygenin (10µg/mL), (B) standard phenacitin (50 µg/mL), (C) blank mouse plasma, and (D) blank mouse plasma spiked with standard phillygenin (10 µg/mL) and internal standard (Phillygenin, retention time = 10.0 min; internal standard, retention time = 8.6 min).

Table S1. Precision, accuracy, extraction recovery and matrix effects for the determination of phillygenin in mouse plasma (n = 6).

| Concentration | Intra-day |              | Inter-day |              | Extraction recovery |         | Matrix effect |         |
|---------------|-----------|--------------|-----------|--------------|---------------------|---------|---------------|---------|
|               | RSD (%)   | Accuracy (%) | RSD (%)   | Accuracy (%) | Mean ±SD (%)        | RSD (%) | Mean ±SD (%)  | RSD (%) |
| <b>0.01</b>   | 6.41      | 103.3        | 12.9      | 92.6         | 101 ± 3.27          | 6.94    | 89.6 ± 4.02   | 5.42    |
| <b>1</b>      | 6.86      | 103.7        | 5.42      | 106          | 103 ± 2.58          | 4.86    | 96.2 ± 3.64   | 6.98    |
| <b>10</b>     | 3.53      | 102.3        | 2.36      | 101          | 101 ± 2.03          | 2.97    | 102 ± 3.95    | 7.52    |

Table S2. Stability of phillygenin in mouse plasma under various conditions (n = 6)

| Stability conditions                          | Concentration (µg/mL) | Calculated concentration |         |              |
|-----------------------------------------------|-----------------------|--------------------------|---------|--------------|
|                                               |                       | Mean ± SD (µg/mL)        | RSD (%) | Accuracy (%) |
| <b>Short-term (RT, 4h)</b>                    | 0.01                  | 0.0090 ± 0.0021          | 10.30   | 90.10        |
|                                               | 1                     | 0.98 ± 0.0058            | 6.56    | 98.01        |
|                                               | 10                    | 9.65 ± 0.72              | 3.26    | 96.51        |
| <b>Long-term</b>                              | 0.01                  | 0.0092 ± 0.0026          | 7.86    | 92.15        |
|                                               | 1                     | 1.03 ± 0.704             | 8.41    | 103.12       |
|                                               | 10                    | 10.01 ± 0.63             | 5.33    | 100.14       |
| <b>Freeze-thaw cycles (from -80 °C to RT)</b> | 0.01                  | 0.0954 ± 0.0007          | 9.64    | 95.44        |
|                                               | 1                     | 1.02 ± 0.050             | 6.84    | 102.31       |
|                                               | 10                    | 10.12 ± 0.231            | 2.97    | 101.20       |
